# Supplementary material for: MicroRNA-1 regulates the development of osteoarthritis in a Col2a1-Cre-ERT2/GFPfl/fl-RFP-miR-1 mouse model of osteoarthritis through the downregulation of Indian hedgehog expression
Source: PubMed Central journal article supplement — Int J Mol Med. 2020 May 12;46(1):360–70. doi: 10.3892/ijmm.2020.4601 (PMC7255451; doi:10.3892/ijmm.2020.4601), 2020-05-12

Figure S1. Expression of Col2a1 in the transgenic mouse model of osteoarthritis. Mouse tissues were collected at two months after ACLT and then subjected to tissue processing and immunohistochemistry (black scale bar: 100  $\mu$ m). The images the bottom panels are magnified images of the are in the yellow boxes in the top panels. Sham, sham-operated; ACLT, anterior cruciate ligament transection; Col2a1, collagen, type II.

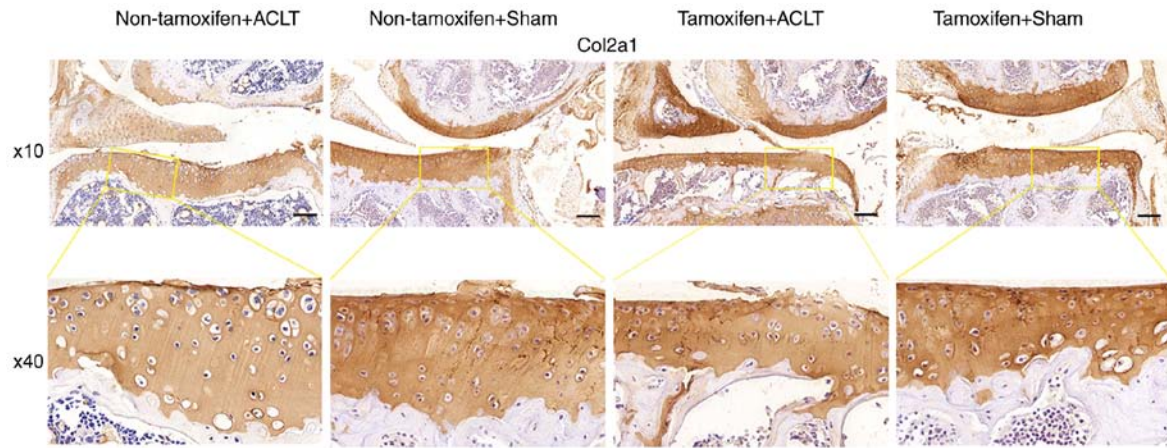

Supplement: Supplementary_Data.pdf [file Supplementary_Data.pdf]
